# Supplementary material for: BWC Confidence‐Building Measures: Increasing BWC Assurance through Transparency & Information Sharing
Source: Preprints.org preprint supplement (doi:10.20944/preprints202404.0851.v1), 2024-04-12
Supplement: Supplementary file 1 [file supplementary]

## Sheet: Sheet1
Supplement- Coding Matrix
Quantitative results for co-coded pairs. The value in each cell represents the number of interviews in which the two associated codes (i.e. row and column) were assigned to the same interview content. The values are shaded by their magnitude relative to the highest value, with darker shades corresponding to co-coded pairs present in more interviews. The row codes are arranged such that they corre…
				Total Interviews	CBM forms & processes	Scope	General approach	Specific fields	Data collection	Data entry	Form submission	Report access	Expansion	Report analysis	Scope of analysis	Comprehensive analysis of all CBMs	Subset analysis of some CBMs	Targeted analysis of specific state party	Type of analysis	Assessment of national implementation	Compare to other data sources	Opportunity for collaboration	Targeted analysis of specific data field	Trend or change monitoring	Analytic capacity	Report follow-up	Translation	State of CBMs	Accuracy	Completeness	Detail	Participation	Legally & politically binding arguments	Value	Transparency, confidence, trust & compliance	Step to verification	Facilitates national implementation improvements	Improves national awareness	Specific interest in another state party's submission	Window into attitude & values	Disconnect from original intent	Roles	States parties	Individual	Bilateral	Multilateral	Group	Geography	Opportunity
CBM forms & processes				24		4	0	1	2	3	2	1	0	1	0	0	0	0	0	0	0	0	0	0	0	2	1	2	1	2	2	4	0	1	5	0	0	0	0	2	2	1	3	0	2	1	1	0	0
	Scope			24	4		1	1	3	1	0	2	0	2	1	1	0	0	1	1	0	1	1	0	1	2	0	0	0	2	1	4	2	2	7	2	1	1	0	2	5	2	4	5	0	2	0	2	0
		General approach		19	0	1		5	2	3	0	0	0	1	1	0	0	0	0	0	1	0	0	1	0	0	0	1	2	2	1	2	0	1	7	1	1	0	1	5	4	1	0	3	0	3	0	0	0
		Specific fields		24	1	1	5		2	3	0	0	2	2	1	0	0	0	0	3	4	1	3	0	1	1	1	1	0	0	4	1	0	3	5	1	0	0	1	6	4	2	3	3	1	2	0	2	0
	Data collection			32	2	3	2	2		11	4	1	0	3	1	0	0	0	0	0	0	1	0	0	1	2	1	0	2	3	1	9	1	2	3	0	3	8	0	1	0	5	6	8	3	1	0	4	1
	Data entry			23	3	1	3	3	11		8	2	0	3	0	0	0	0	0	0	0	0	0	0	0	0	4	1	1	4	3	4	0	1	0	0	0	1	0	0	1	1	5	2	1	0	0	2	0
	Form submission			19	2	0	0	0	4	8		2	0	2	0	0	0	0	0	0	0	1	0	0	0	1	0	0	0	0	0	2	0	0	2	0	0	0	0	1	0	0	4	2	0	0	1	0	0
	Report access			14	1	2	0	0	1	2	2		2	5	1	0	0	0	2	0	1	0	0	0	1	1	2	0	1	1	1	1	0	0	0	0	0	0	0	0	0	0	1	2	0	0	0	0	0
		Expansion		18	0	0	0	2	0	0	0	2		4	0	0	1	0	1	1	2	0	0	2	2	1	0	0	1	1	1	1	0	2	5	0	0	1	1	1	0	1	3	2	0	0	0	0	0
	Report analysis			25	1	2	1	2	3	3	2	5	4		0	0	1	1	1	1	2	1	1	2	2	7	2	1	1	2	3	5	0	3	5	2	0	0	3	3	0	1	5	3	1	2	0	0	0
		Scope of analysis		10	0	1	1	1	1	0	0	1	0	0		0	0	0	3	1	1	0	0	1	2	0	1	0	0	1	1	0	0	0	1	0	0	0	2	2	0	0	2	0	0	0	0	2	0
			Comprehensive analysis of all CBMs	4	0	1	0	0	0	0	0	0	0	0	0		0	0	1	0	1	0	1	2	3	0	0	0	0	0	0	1	1	1	2	0	0	0	0	0	0	1	1	0	0	0	0	0	0
			Subset analysis of some CBMs	8	0	0	0	0	0	0	0	0	1	1	0	0		2	2	1	1	2	2	1	1	0	1	0	0	0	0	0	0	0	3	0	0	0	2	1	0	0	1	0	0	0	2	2	0
			Targeted analysis of specific state party	9	0	0	0	0	0	0	0	0	0	1	0	0	2		0	0	1	2	4	0	2	0	4	0	0	0	0	0	0	0	1	0	0	0	1	0	0	0	1	0	1	0	0	0	0
		Type of analysis		11	0	1	0	0	0	0	0	2	1	1	3	1	2	0		0	0	1	1	1	4	0	0	0	2	2	2	0	0	0	2	1	0	0	1	0	0	0	1	1	0	0	1	2	0
			Assessment of national implementation	11	0	1	0	3	0	0	0	0	1	1	1	0	1	0	0		1	1	1	1	1	0	0	0	1	1	2	0	1	0	2	0	2	0	1	6	0	1	0	0	0	0	0	0	0
			Compare to other data sources	18	0	0	1	4	0	0	0	1	2	2	1	1	1	1	0	1		4	2	3	2	3	0	0	5	3	2	2	1	2	7	1	0	0	2	5	3	0	3	2	2	1	0	0	0
			Opportunity for collaboration	20	0	1	0	1	1	0	1	0	0	1	0	0	2	2	1	1	4		4	1	2	3	0	1	3	2	2	5	0	7	8	0	5	1	1	3	1	0	6	2	7	3	1	3	0
			Targeted analysis of specific data field	13	0	1	0	3	0	0	0	0	0	1	0	1	2	4	1	1	2	4		5	4	1	1	0	0	0	1	0	0	2	2	1	0	0	0	0	1	1	0	0	0	0	0	0	0
			Trend or change monitoring	15	0	0	1	0	0	0	0	0	2	2	1	2	1	0	1	1	3	1	5		2	2	0	0	1	1	2	2	0	3	2	0	0	0	2	2	0	0	2	0	1	0	0	1	0
		Analytic capacity		17	0	1	0	1	1	0	0	1	2	2	2	3	1	2	4	1	2	2	4	2		2	2	0	1	1	0	2	1	1	3	1	0	0	0	0	0	1	3	1	1	1	1	1	0
	Report follow-up			21	2	2	0	1	2	0	1	1	1	7	0	0	0	0	0	0	3	3	1	2	2		0	1	7	6	2	4	1	3	8	2	2	0	0	0	2	1	2	1	6	5	0	1	0
	Translation			15	1	0	0	1	1	4	0	2	0	2	1	0	1	4	0	0	0	0	1	0	2	0		0	0	1	1	0	0	0	0	0	0	0	1	0	0	0	1	2	2	0	1	2	0
State of CBMs				10	2	0	1	1	0	1	0	0	0	1	0	0	0	0	0	0	0	1	0	0	0	1	0		0	0	0	2	1	3	5	1	0	0	0	1	1	0	1	2	0	0	0	0	0
	Accuracy			23	1	0	2	0	2	1	0	1	1	1	0	0	0	0	2	1	5	3	0	1	1	7	0	0		19	13	6	3	2	11	2	1	0	0	0	1	0	1	4	3	2	0	1	0
	Completeness			26	2	2	2	0	3	4	0	1	1	2	1	0	0	0	2	1	3	2	0	1	1	6	1	0	19		17	7	4	2	13	4	1	1	1	1	2	0	4	4	2	1	0	1	0
	Detail			23	2	1	1	4	1	3	0	1	1	3	1	0	0	0	2	2	2	2	1	2	0	2	1	0	13	17		4	1	1	7	2	1	1	1	2	0	0	4	1	1	0	0	0	0
	Participation			32	4	4	2	1	9	4	2	1	1	5	0	1	0	0	0	0	2	5	0	2	2	4	0	2	6	7	4		11	5	13	1	3	4	1	5	1	3	11	9	2	3	2	6	0
		Legally & politically binding arguments		23	0	2	0	0	1	0	0	0	0	0	0	1	0	0	0	1	1	0	0	0	1	1	0	1	3	4	1	11		3	9	4	1	1	0	2	1	1	4	7	1	1	1	0	0
Value				26	1	2	1	3	2	1	0	0	2	3	0	1	0	0	0	0	2	7	2	3	1	3	0	3	2	2	1	5	3		6	0	3	2	0	2	4	1	8	3	1	3	0	0	0
	Transparency, confidence, trust & compliance			37	5	7	7	5	3	0	2	0	5	5	1	2	3	1	2	2	7	8	2	2	3	8	0	5	11	13	7	13	9	6		9	5	5	7	15	12	3	10	11	6	9	0	4	1
	Step to verification			19	0	2	1	1	0	0	0	0	0	2	0	0	0	0	1	0	1	0	1	0	1	2	0	1	2	4	2	1	4	0	9		0	0	1	0	2	1	1	2	0	4	1	0	0
	Facilitates national implementation improvements			22	0	1	1	0	3	0	0	0	0	0	0	0	0	0	0	2	0	5	0	0	0	2	0	0	1	1	1	3	1	3	5	0		12	2	5	0	2	2	3	5	3	0	3	0
	Improves national awareness			26	0	1	0	0	8	1	0	0	1	0	0	0	0	0	0	0	0	1	0	0	0	0	0	0	0	1	1	4	1	2	5	0	12		0	1	0	2	2	1	2	2	0	3	0
	Specific interest in another state party's submission			13	0	0	1	1	0	0	0	0	1	3	2	0	2	1	1	1	2	1	0	2	0	0	1	0	0	1	1	1	0	0	7	1	2	0		5	1	0	3	2	2	1	0	0	1
	Window into attitude & values			25	2	2	5	6	1	0	1	0	1	3	2	0	1	0	0	6	5	3	0	2	0	0	0	1	0	1	2	5	2	2	15	0	5	1	5		3	1	7	7	1	2	0	1	0
	Disconnect from original intent			19	2	5	4	4	0	1	0	0	0	0	0	0	0	0	0	0	3	1	1	0	0	2	0	1	1	2	0	1	1	4	12	2	0	0	1	3		1	3	4	0	2	0	0	0
Roles				9	1	2	1	2	5	1	0	0	1	1	0	1	0	0	0	1	0	0	1	0	1	1	0	0	0	0	0	3	1	1	3	1	2	2	0	1	1		1	3	0	2	0	2	0
	States parties			25	3	4	0	3	6	5	4	1	3	5	2	1	1	1	1	0	3	6	0	2	3	2	1	1	1	4	4	11	4	8	10	1	2	2	3	7	3	1		3	0	2	1	3	1
		Individual		22	0	5	3	3	8	2	2	2	2	3	0	0	0	0	1	0	2	2	0	0	1	1	2	2	4	4	1	9	7	3	11	2	3	1	2	7	4	3	3		4	5	0	4	1
		Bilateral		19	2	0	0	1	3	1	0	0	0	1	0	0	0	1	0	0	2	7	0	1	1	6	2	0	3	2	1	2	1	1	6	0	5	2	2	1	0	0	0	4		8	1	4	0
		Multilateral		22	1	2	3	2	1	0	0	0	0	2	0	0	0	0	0	0	1	3	0	0	1	5	0	0	2	1	0	3	1	3	9	4	3	2	1	2	2	2	2	5	8		1	6	0
		Group		6	1	0	0	0	0	0	1	0	0	0	0	0	2	0	1	0	0	1	0	0	1	0	1	0	0	0	0	2	1	0	0	1	0	0	0	0	0	0	1	0	1	1		1	0
			Geography	20	0	2	0	2	4	2	0	0	0	0	2	0	2	0	2	0	0	3	0	1	1	1	2	0	1	1	0	6	0	0	4	0	3	3	0	1	0	2	3	4	4	6	1		0
			Opportunity	3	0	0	0	0	1	0	0	0	0	0	0	0	0	0	0	0	0	0	0	0	0	0	0	0	0	0	0	0	0	0	1	0	0	0	1	0	0	0	1	1	0	0	0	0
			Resource/income level	11	0	0	0	1	2	0	1	0	1	0	0	0	0	0	0	0	0	0	0	0	3	0	1	0	0	0	0	1	0	1	2	0	0	0	1	2	0	0	4	2	0	0	0	2	2
			Risk	14	1	0	0	1	1	0	0	0	0	1	0	0	1	0	1	0	0	0	2	0	1	1	0	2	2	2	0	2	1	1	8	0	0	1	2	1	0	1	3	1	0	1	0	0	1
			Power	4	0	0	0	0	0	0	0	0	0	1	0	0	0	0	0	0	0	0	0	0	0	0	0	0	0	0	0	0	0	0	1	0	0	0	0	0	0	0	0	1	1	0	0	2	0
	Civil society			26	1	3	0	3	3	1	0	3	6	7	1	1	1	0	2	1	5	2	0	2	6	0	0	1	1	1	0	5	0	1	5	0	0	1	1	3	3	1	9	5	0	1	1	2	0
	Implementation Support Unit (ISU)			27	2	2	2	1	4	3	5	2	2	5	0	1	0	0	4	0	0	2	1	1	6	1	1	0	1	2	2	9	0	0	2	1	2	0	0	1	0	1	8	5	2	3	1	4	0
	International organization community			22	1	2	0	3	3	0	0	0	1	1	0	0	1	0	0	2	0	1	0	0	1	0	0	0	0	0	1	7	0	0	2	1	3	1	0	4	2	1	5	4	0	4	2	6	0
	Government agencies			16	1	3	0	1	11	3	1	0	0	1	0	0	0	0	0	0	2	0	0	0	0	0	1	0	1	1	1	5	1	0	6	0	2	8	1	3	1	0	3	7	0	1	0	2	1
	Military			9	1	2	1	4	0	0	0	0	0	0	0	0	0	0	0	0	0	1	0	1	0	0	0	0	1	1	1	1	0	0	4	0	0	1	0	2	2	0	2	2	1	0	0	1	0
	Other laboratories			12	0	3	0	2	4	0	0	0	0	2	0	0	0	0	0	0	0	0	0	0	0	0	0	0	0	1	1	0	0	0	2	0	0	1	0	3	3	1	2	0	0	0	0	0	0
	Private sector industry			9	0	3	0	2	3	0	0	0	0	1	0	0	0	0	0	0	0	0	0	1	0	0	0	0	0	1	1	0	0	1	2	0	0	1	0	3	4	0	1	2	0	1	0	0	0
	General public			3	0	0	0	1	0	0	0	0	1	0	0	0	0	0	0	0	1	0	0	0	1	0	0	0	0	0	0	0	0	0	1	0	1	1	0	0	1	0	0	1	0	0	0	0	0
References & examples				18	2	3	2	3	8	1	1	0	0	1	0	0	1	1	0	2	0	3	2	1	2	1	1	1	2	3	4	3	1	1	5	0	2	2	0	2	2	2	1	7	2	1	0	4	0
	Proposals			22	3	3	2	5	5	2	3	2	0	2	0	0	0	0	0	0	1	2	0	0	2	1	0	0	0	1	0	6	0	3	2	1	0	1	0	2	2	1	6	3	2	4	1	1	0
Alternative mechanisms				32	2	3	2	4	6	1	2	1	3	5	0	1	1	1	1	3	5	8	1	1	3	5	0	0	0	2	1	5	3	6	18	4	7	3	2	6	3	3	11	3	10	11	0	5	0
Feasibility				3	0	0	0	1	0	0	0	0	0	2	0	0	0	0	0	0	1	1	1	0	0	0	0	0	0	0	0	1	0	1	0	0	0	0	0	0	0	0	1	0	0	0	0	0	0
	Facilitator			27	4	0	2	1	13	5	3	2	3	4	0	2	0	0	0	4	4	6	0	1	4	2	0	1	3	2	3	14	6	6	9	1	7	8	0	8	2	2	8	11	7	3	3	7	0
	Barrier			35	4	7	9	8	21	12	4	5	6	8	3	1	0	2	3	2	6	7	3	2	14	8	8	4	12	16	9	21	14	4	18	11	1	5	1	3	8	7	11	16	7	11	2	8	1
	Resource scarcity-surplus			34	3	2	2	4	15	5	2	1	2	4	2	1	0	2	0	1	1	0	3	1	13	4	4	0	4	5	2	15	0	2	7	2	1	3	1	1	0	4	6	8	2	1	0	5	2
	Lack of knowledge			27	2	1	1	2	19	7	3	1	1	5	0	0	0	0	0	0	0	1	1	0	2	2	0	1	2	4	3	13	0	1	5	1	4	7	0	1	0	4	6	10	5	2	2	6	0
	Political feasibility			31	0	1	3	4	3	0	0	1	2	0	0	0	0	0	0	0	1	0	0	0	2	1	1	0	3	4	0	7	3	2	10	8	0	1	1	2	4	2	8	7	7	12	3	4	1
	Practical feasibility			28	1	5	5	3	6	3	0	2	1	2	2	1	0	0	2	1	4	1	1	1	5	4	2	2	6	6	1	11	3	4	10	5	0	1	1	3	6	2	9	5	1	3	0	4	1
	Technological feasibility			23	1	4	0	3	0	5	9	2	0	5	0	1	0	0	0	1	0	1	2	2	1	0	4	0	0	1	1	2	0	2	3	1	0	1	0	1	3	0	2	2	1	0	0	1	0
Sentiment				1	0	0	0	0	0	0	0	0	0	0	0	0	0	0	0	0	0	0	0	0	0	0	0	0	0	0	0	0	0	0	1	0	0	0	0	0	0	0	0	0	0	0	0	0	0
	Pro			29	6	2	6	7	8	1	2	3	7	7	1	2	0	0	3	4	2	6	2	3	8	8	1	1	3	2	4	10	3	8	15	5	8	9	4	8	2	2	9	2	6	5	1	3	0
	Anti			10	0	1	1	5	0	0	0	0	1	0	0	0	0	0	0	0	2	2	0	0	0	0	1	0	0	0	0	1	1	2	4	2	0	0	0	2	2	0	1	2	3	1	1	1	0
	Sufficient			25	8	6	4	4	6	3	1	1	1	0	0	0	0	0	0	0	0	3	1	0	1	1	1	2	2	3	2	4	0	1	6	0	1	4	0	3	1	1	2	1	2	2	0	0	0
	Needs to improve			34	9	9	10	10	7	11	6	2	2	6	0	1	0	0	2	2	1	3	0	0	5	6	2	5	10	10	13	17	7	7	17	6	4	3	1	9	8	4	9	11	2	6	0	4	0
	Recommendation			33	9	9	5	8	11	7	2	1	6	6	0	1	0	0	2	2	5	5	3	1	7	6	4	2	6	7	10	14	4	8	16	5	6	1	0	7	5	3	11	7	5	10	2	3	0
[truncated: 28 more columns]
